# Supplementary material
Source: MDPI journal article supplement (https://www.mdpi.com/2077-0472/12/3/412)
Supplement: s1 [file s1]

| Table S1 Diagram of Holt and Laury method                                           |                                                                                     |                                                                                      |                                                                                       |
|-------------------------------------------------------------------------------------|-------------------------------------------------------------------------------------|--------------------------------------------------------------------------------------|---------------------------------------------------------------------------------------|
| Gamble A                                                                            |                                                                                     | Gamble B                                                                             |                                                                                       |
| Option 1                                                                            | Option 2                                                                            | Option 1                                                                             | Option 2                                                                              |
| 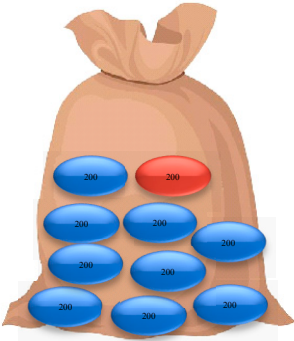   |    |    |    |
|   |   |   |   |
|  |  |  |  |

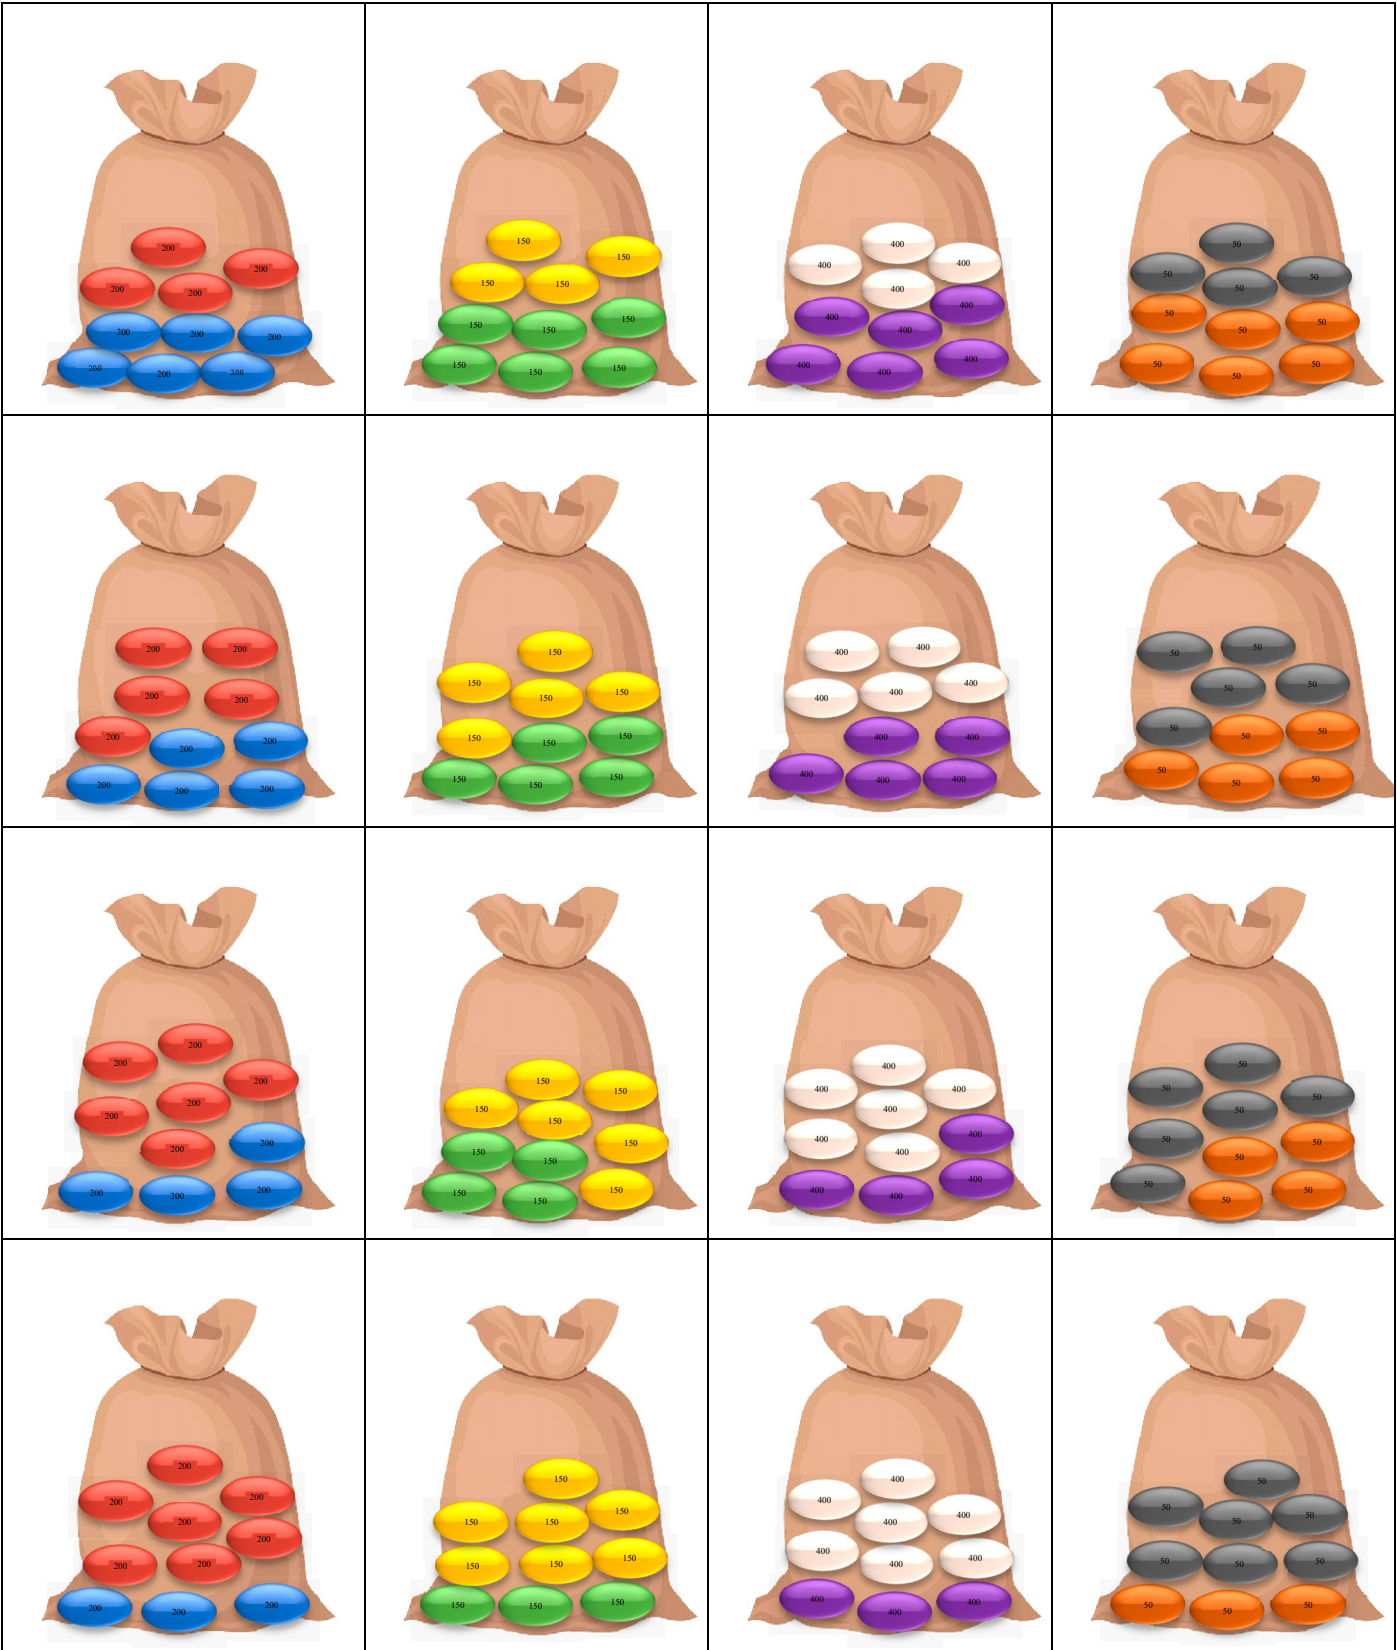

|                                                                                     |                                                                                     |                                                                                      |                                                                                       |
|-------------------------------------------------------------------------------------|-------------------------------------------------------------------------------------|--------------------------------------------------------------------------------------|---------------------------------------------------------------------------------------|
| 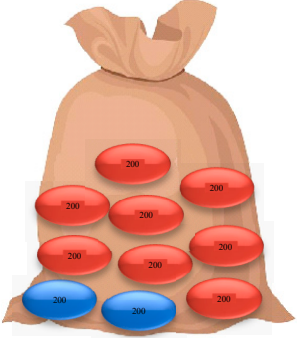   |    |    |    |
|   |   |   |   |
|  |  |  |  |
| PKR 200                                                                             | PKR 150                                                                             | PKR 400                                                                              | PKR 50                                                                                |
